# Supplementary material for: Ethyl maltol, vanillin, corylone and other conventional confectionery-related flavour chemicals dominate in some e-cigarette liquids labelled ‘tobacco’ flavoured
Source: PubMed Central journal article supplement — Tob Control. 2022 Oct 28;31(Suppl 3):s238–44. doi: 10.1136/tc-2022-057484 (PMC9664106; doi:10.1136/tc-2022-057484), 2022-10-28
Supplement: tc-2022-057484supp001.pdf [file tc-2022-057484supp001.pdf]

**Supplementary Table S1: Product Information for Tobacco Flavored Refill Fluids and E-Liquids**

|    | <b>Company/Brand</b> | <b>Name of Refill Fluid</b>  | <b>Purchase Year</b> | <b>Label Code</b> |
|----|----------------------|------------------------------|----------------------|-------------------|
| 1  | Johnson Creek        | JC Original                  | 2011                 | JC_O #1           |
| 2  | Johnson Creek        | Tennessee Cured              | 2011                 | JC_TC #1          |
| 3  | Johnson Creek        | Tennessee Cured              | 2011                 | JC_TC #2          |
| 4  | Johnson Creek        | JC Original                  | 2011                 | JC_O #2           |
| 5  | Johnson Creek        | Tennessee Cured              | 2011                 | JC_TC #3          |
| 6  | Johnson Creek        | French Vanilla               | 2011                 | JC_FV             |
| 7  | Johnson Creek        | Espresso                     | 2011                 | JC_E #1           |
| 8  | Johnson Creek        | Espresso                     | 2011                 | JC_E #2           |
| 9  | Johnson Creek        | Arctic Menthol               | 2011                 | JC_AM #2          |
| 10 | Red Oak              | Domestic                     | 2011                 | RO_D #2           |
| 11 | Red Oak              | Swiss Dark                   | 2011                 | RO_SD #2          |
| 12 | Red Oak              | Tennessee Cured              | 2011                 | RO_TC #4          |
| 13 | Johnson Creek        | Arctic Menthol               | 2011                 | JC_AM #1          |
| 14 | Red Oak              | Marcado                      | 2011                 | RO_M #2           |
| 15 | Red Oak              | Domestic                     | 2012                 | RO_D #1           |
| 16 | Red Oak              | Swiss Dark                   | 2012                 | RO_SD #1          |
| 17 | Red Oak              | Wisconsin Frost              | 2012                 | RO_WF             |
| 18 | Red Oak              | Marcado                      | 2012                 | RO_M #1           |
| 19 | LiQua                | American Blend Tob.          | 2015                 | L_AB #1           |
| 20 | LiQua                | Traditional Tob.             | 2015                 | L_Td #1           |
| 21 | LiQua                | Q Traditional Tob.           | 2015                 | L_Q-Td #1         |
| 22 | LiQua                | Q American Blend Tob.        | 2015                 | L_Q-AB            |
| 23 | LiQua                | Cuban Cigar Tob.             | 2015                 | L_CC              |
| 24 | LiQua                | Turkish Tob.                 | 2015                 | L_Tk              |
| 25 | LiQua                | Q Turkish Tob.               | 2015                 | L_Q-Tk            |
| 26 | LiQua                | Bright Tob.                  | 2015                 | L_B #1            |
| 27 | LiQua                | Bright Tob.                  | 2015                 | L_B #3            |
| 28 | LiQua                | Bright Tob.                  | 2015                 | L_B #4            |
| 29 | LiQua                | Bright Tob.                  | 2015                 | L_B #6            |
| 30 | LiQua                | Bright Tob.                  | 2015                 | L_B #7            |
| 31 | LiQua                | Traditional Tob.             | 2016                 | L_Td #2           |
| 32 | LiQua                | American Blend Tob.          | 2016                 | L_AB #2           |
| 33 | LiQua                | Q Traditional Tob.           | 2016                 | L_Q-Td #2         |
| 34 | LiQua                | Golden Oriental Tob.         | 2016                 | L_GO              |
| 35 | LiQua                | Goldenrod Oriental Tob.      | 2016                 | L_GRO             |
| 36 | LiQua                | Q Havana Libre (Cuban Cigar) | 2016                 | L_Q-HL            |
| 37 | LiQua                | Vermillion Oriental Tob.     | 2016                 | L_VO              |
| 38 | LiQua                | Red Oriental Tob.            | 2016                 | L_RO #1           |
| 39 | LiQua                | Red Oriental Tob.            | 2016                 | L_RO #2           |

|    |                 |                                       |      |          |
|----|-----------------|---------------------------------------|------|----------|
| 40 | LiQua           | Virginia Tob.                         | 2016 | L_V      |
| 41 | LiQua           | Q Golden Roanoke (Virginia Tob.)      | 2016 | L_Q-GR   |
| 42 | LiQua           | Q Piedmont Sunrise (Bright leaf Tob.) | 2016 | L_Q-P    |
| 43 | LiQua           | Bright Tob.                           | 2016 | L_B #2   |
| 44 | LiQua           | Bright Tob.                           | 2016 | L_B #5   |
| 45 | LiQua           | Q The Moment (Tob. purity)            | 2016 | L_Q-TM   |
| 46 | LiQua           | Mild Kretek Tob.                      | 2016 | L_MK     |
| 47 | LiQua           | French Pipe Tob.                      | 2016 | L_FP     |
| 48 | LiQua           | Ry4 Tob.                              | 2016 | L_Ry4 #1 |
| 49 | LiQua           | Ry4 Tob.                              | 2016 | L_Ry4 #2 |
| 50 | LiQua           | Ry4 Tob.                              | 2016 | L_Ry4 #3 |
| 51 | LiQua           | Ry4 Tob.                              | 2016 | L_Ry4 #4 |
| 52 | Vape Place      | Captain Black Tob.                    | 2019 | VP_CB    |
| 53 | Vape Place      | House Blend Tob.                      | 2019 | VP_HBT   |
| 54 | Halo            | Turkish Tobacco (Robust Tob.)         | 2019 | H_Tk     |
| 55 | Canyon Crest VS | Desert Ship                           | 2019 | CCV_DS   |
| 56 | Canyon Crest VS | Marvel                                | 2019 | CCV_M    |
| 57 | Canyon Crest VS | Ry4                                   | 2019 | CCV_Ry4  |
| 58 | VaporFi         | Sahara Gold Tob.                      | 2019 | VF_SG    |
| 59 | VaporFi         | Ry4 Caramel Tob.                      | 2019 | VF_Ry4C  |
| 60 | Canyon Crest VS | Clove Tob.                            | 2019 | CCV_CT   |
| 61 | Canyon Crest VS | Black Flag Fallen                     | 2019 | CCV_BFF  |
| 62 | Halo            | Tribeca (Smooth Tob.)                 | 2019 | H_Tb     |
| 63 | Charlie Noble   | Turkish Tob. Fig Almond               | 2019 | CN_Tk    |
| 64 | JUUL            | Virginia Tob.                         | 2018 | J_VT     |
| 65 | JUUL            | Classic Tob.                          | 2019 | J_CT     |
| 66 | Puff Bar        | Tobacco                               | 2020 | PB_T     |
